# Supplementary material for: Singe atom Bi decorated copper alloy enables C-C coupling for electrocatalytic reduction of CO2 into C2+ products
Source: Research Square preprint supplement (doi:10.21203/rs.3.rs-2298906/v1), 2022-12-16
Supplement: Supplementary file 1 [file 697caafdefa0da78009a5320.pdf]

1 **Supplementary Information**

2  
3 **Singe atom Bi decorated copper alloy enables C-C coupling for electrocatalytic**  
4 **reduction of CO<sub>2</sub> into C<sub>2+</sub> products**

5 **Authors:**

6 Yucheng Cao<sup>1,2,7</sup>, Suya Chen<sup>3,7</sup>, Shuowen Bo<sup>4,7</sup>, Wenjun Fan<sup>1</sup>, Jiangnan Li<sup>1,2</sup>, Chunmei Jia<sup>1</sup>, Zhen  
7 Zhou<sup>3,5</sup>, Qinghua Liu<sup>4</sup>, Lirong Zheng<sup>6</sup> and Fuxiang Zhang<sup>\*1</sup>

8  
9 **Affiliations:**

10 <sup>1</sup> State Key Laboratory of Catalysis, Dalian Institute of Chemical Physics, Chinese Academy of  
11 Sciences, Dalian National Laboratory for Clean Energy, Dalian 116023, Liaoning, China.

12 <sup>2</sup> Center of Materials Science and Optoelectronics Engineering, University of Chinese Academy of  
13 Sciences; Beijing 100049, China.

14 <sup>3</sup> School of Materials Science and Engineering, Institute of New Energy Material Chemistry,  
15 Renewable Energy Con-version and Storage Center (ReCast), Key Laboratory of Advanced  
16 Energy Materials Chemistry (Ministry of Educa-tion), Nankai University, Tianjin 300350, China.

17 <sup>4</sup> National Synchrotron Radiation Laboratory, University of Science and Technology of China,  
18 Hefei 230029, Anhui, China.

19 <sup>5</sup> School of Chemical Engineering, Zhengzhou University, Zhengzhou 450001, Henan, China.

20 <sup>6</sup> Beijing Synchrotron Radiation Facility, Institute of High Energy Physics, Chinese Academy of  
21 Sciences, Beijing 100049, China.

22 <sup>7</sup> These authors contributed equally: Yucheng Cao, Suya Chen, Shuowen Bo.

23  
24 \*Correspondence to: [fxzhang@dicp.ac.cn](mailto:fxzhang@dicp.ac.cn)

25

## 1 **Supplementary methods**

### 2 **DFT calculation details**

3 The binding strength of different Configurations for the BiCu-SAA catalyst was  
4 evaluated by the binding energy ( $E_b$ ), which is defined as:

$$5 E_b = E_{\text{BiCu(111)-SAA}} - E_{\text{Cu(111)}} - E_{\text{Bi}} \quad (1)$$

6 where the  $E_{\text{BiCu(111)-SAA}}$  is the total energy of the catalyst system,  $E_{\text{Cu(111)}}$  represents the  
7 energy of the system without a supported or embedded Bi atom, and  $E_{\text{Bi}}$  represents the  
8 energy of a single Bi atom in vacuum. In general, when  $E_b$  is more negative, the catalyst  
9 is thermodynamically more stable. The exact reaction conditions for different catalysts  
10 were shown in Supplementary Fig. 25 and Supplementary Table 3.

11 The lattice parameter of the optimized Cu(111) slab was 3.63 Å, which was very  
12 close to the experimental lattice parameter of 3.62 Å. The Cu(111) slab was composed  
13 of three layers (the top layer was allowed to relax and the bottom two layers were fixed  
14 to the bulk Cu configuration). The optimized structures of the key intermediates within  
15 CO<sub>2</sub> reduction to C<sub>2</sub>H<sub>4</sub> on Cu(111) and BiCu(111)-SAA surfaces were displayed in  
16 Supplementary Fig. 26 and Fig. 27.

17 The catalytic activity of the studied catalysts was calculated by the computational  
18 hydrogen electrode (CHE) model<sup>1</sup>. The free energy change of each elementary step was  
19 determined as:

$$20 \Delta G = \Delta E + \Delta \text{ZPE} - T \cdot \Delta S \quad (2)$$

21 where  $\Delta E$ ,  $\Delta \text{ZPE}$ , and  $T \cdot \Delta S$  represent the reaction energy, the zero-point energy  
22 correction change, and the change in entropy contribution. The free energy correction  
23 was performed by the VASPKIT code<sup>2</sup>.

24 The charge density difference for the BiCu(111)-SAA slab was calculated according  
25 to:

$$26 \Delta \rho = \rho_{\text{BiCu(111)-SAA}} - (\rho_{\text{Bi}} + \rho_{\text{Cu(111)}}) \quad (3)$$

27 where  $\rho_{\text{BiCu(111)-SAA}}$  is the charge density of the whole system,  $\rho_{\text{Bi}}$  is the charge density  
28 of a single Bi atom, and  $\rho_{\text{Cu(111)}}$  is the charge density of the BiCu(111)-SAA system  
29 after removing the embedded Bi.

1 **Evaluation of CO<sub>2</sub>RR performance**

2 For gaseous products, the Faradaic efficiency (FE) was calculated as:

3 
$$FE_a (\%) = i_a/i_{total} \times 100\% = x_a \times f_{CO_2} \times N_a \times F/i_{total} \times 100\% \quad (4)$$

4 where  $i_a$  is the partial current towards species a (A),  $i_{total}$  is the total current (A),  $x_a$  is  
5 the concentration of species a measured by GC ( $\text{mol mol}^{-1}$ ),  $f_{CO_2}$  is the CO<sub>2</sub> flow rate  
6 ( $\text{mol s}^{-1}$ ),  $N_a$  is the number of exchanged electrons to produce species g from CO<sub>2</sub>, and  
7 F is Faraday constant ( $96485 \text{ C mol}^{-1}$ ).

8 For liquid products, the Faradaic efficiency (FE) was calculated as:

9 
$$FE_b (\%) = q_b/q_{total} \times 100\% = F \times c_b \times V \times N_b/q_{total} \times 100\% \quad (5)$$

10 where  $q_b$  is the partial charge to produce species b (C),  $q_{total}$  is the total charge passed  
11 (C), V is the electrolyte volume (L), and  $c_b$  is the concentration of species b calculated  
12 from the <sup>1</sup>H NMR with internal standard method ( $\text{mol L}^{-1}$ ).

13

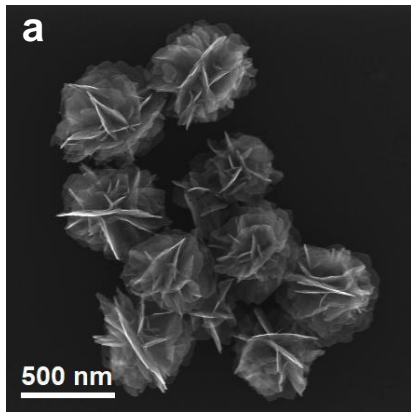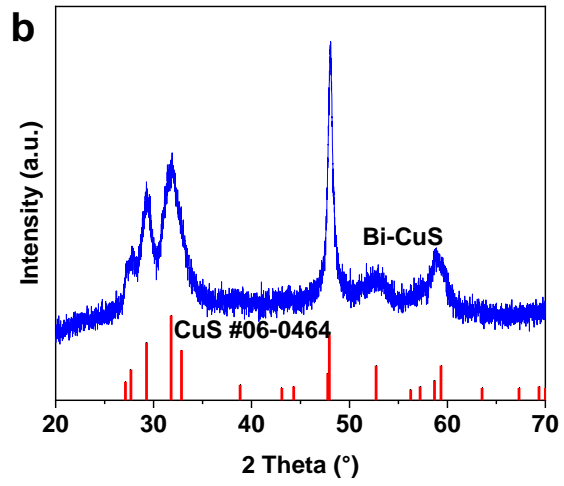

1  
2  
3  
4

**Supplementary Fig. 1 | Structural characterizations of Bi-CuS precursor: (a) SEM image; (b) XRD patterns.**

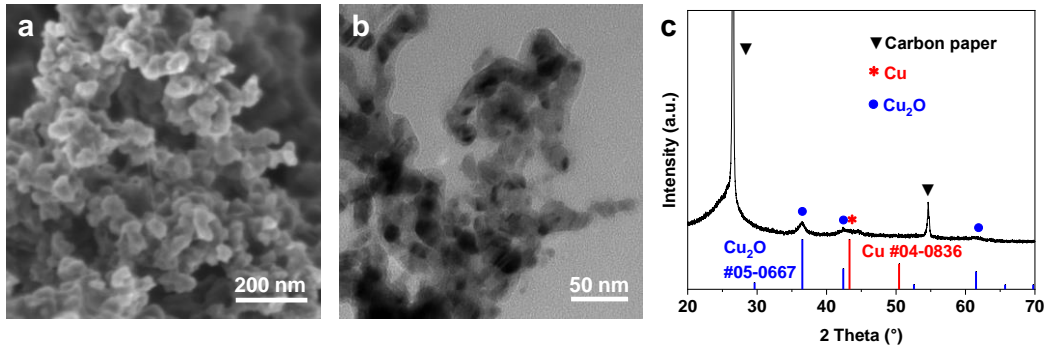

1

2 **Supplementary Fig. 2 | Structural characterizations of Cu-Nano catalyst prepared:**

3 (a) SEM image, (b) TEM image, (c) XRD patterns.

4

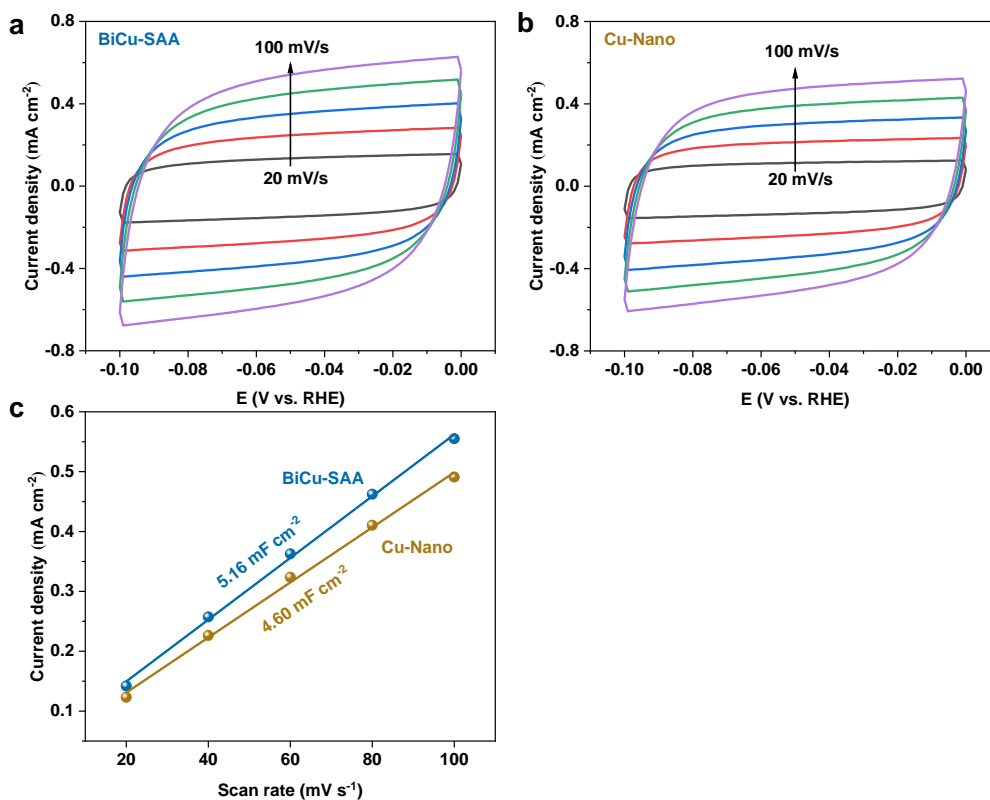

1

2 **Supplementary Fig. 3** | CV curves of the BiCu-SAA (a) and Cu-Nano catalysts (b)

3 obtained in capacitance region at varying scan rate, and their corresponding capacitance

4 current density at -0.05 V vs. RHE as a function of scan rate (c).

5

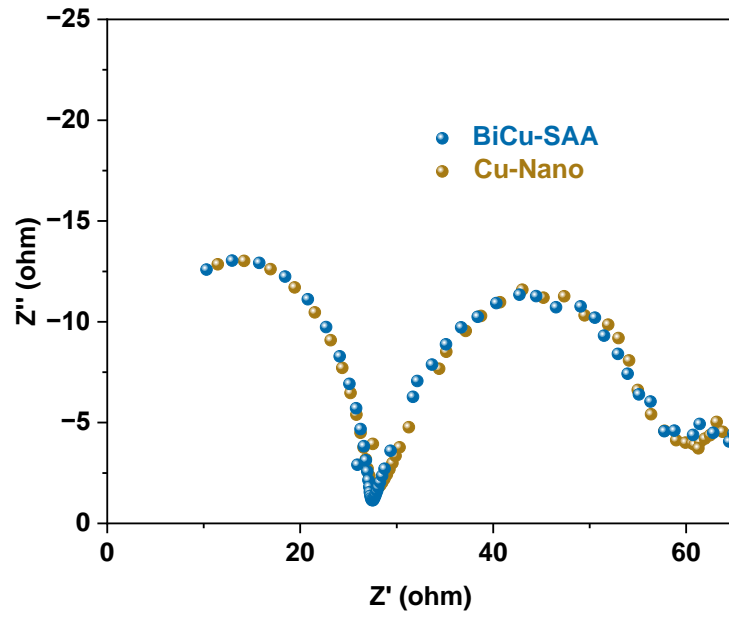

1

2 **Supplementary Fig. 4 | Electrochemical impedance spectroscopy (EIS) of the BiCu-**

3 **SAA and Cu-Nano catalysts at the applied potential of -0.8 V vs. RHE.**

4

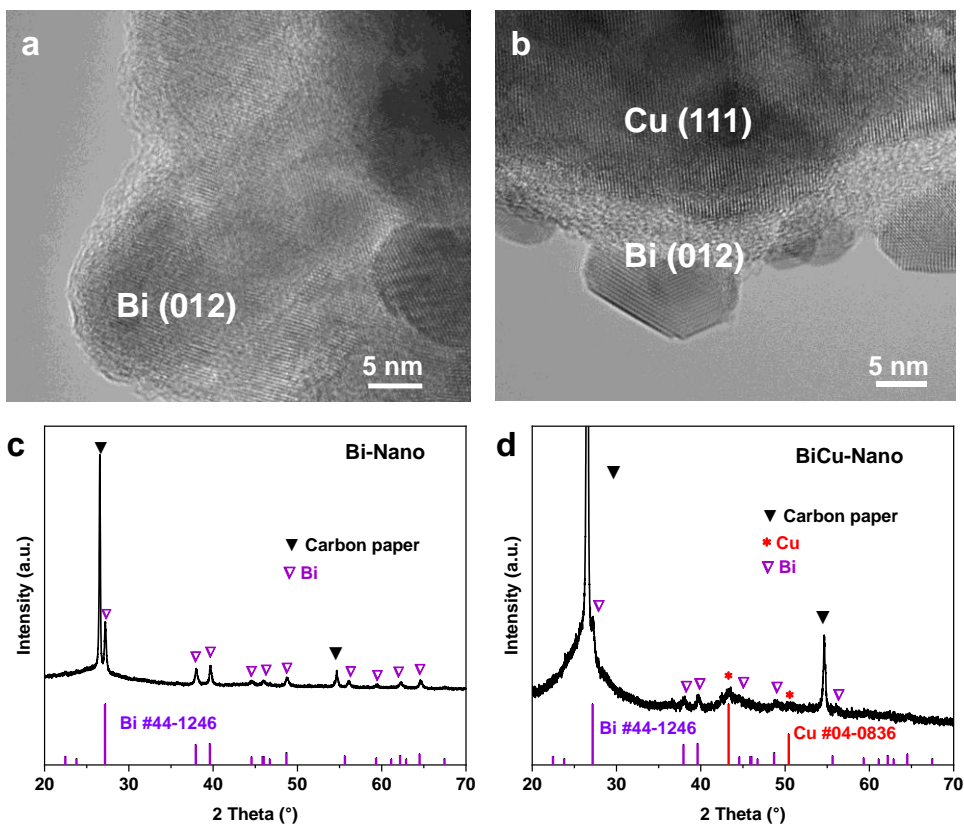

1  
2  
3  
4

**Supplementary Fig. 5 | Structural characterizations of Bi-Nano (a, c) and BiCu-Nano (b, d) catalysts: (a, b) HR-TEM images; (c, d) XRD patterns.**

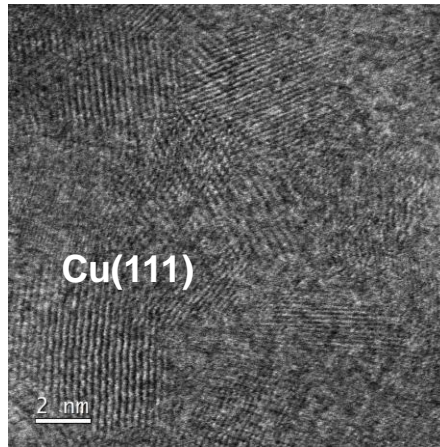

1

2 **Supplementary Fig. 6** | HAADF-STEM image of the BiCu-SAA in the bright field  
3 corresponding to Fig. 1a, where the Cu(111) facet can be recognized.

4

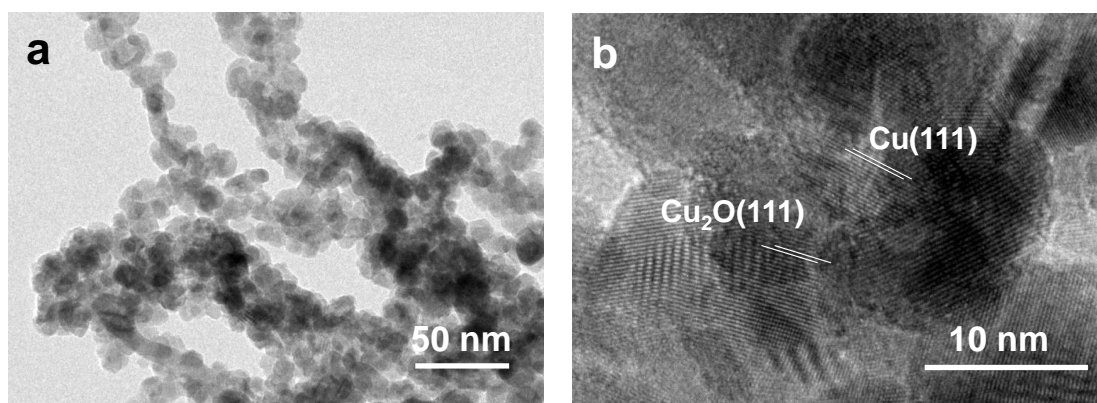

1

2 **Supplementary Fig. 7 | HRTEM images of the BiCu-SAA catalyst.**

3 Note: It shows the completely different morphology from the nanoflower of its  
4 precursor Bi-CuS, indicating the structural reconstruction of Bi-CuS complex  
5 precursors during the electroreduction treatment. Meanwhile, Cu(111) and Cu<sub>2</sub>O(111)  
6 facet can be clearly observed.

7

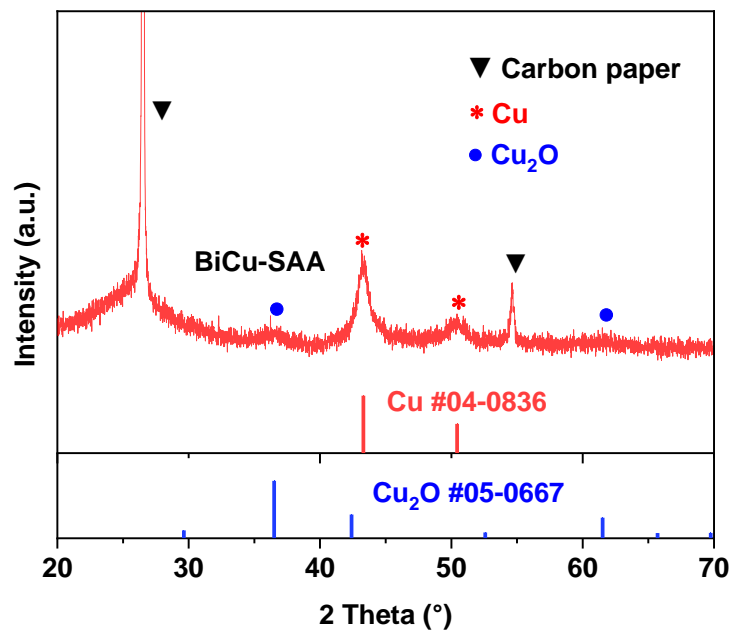

1

2 **Supplementary Fig. 8 | XRD pattern of the BiCu-SAA catalyst.**

3 Note: Both Cu and Cu<sub>2</sub>O phases can be detected but without the presence of CuS and

4 Bi nanoparticle species, ruling out the existence of Bi nanoparticles.

5

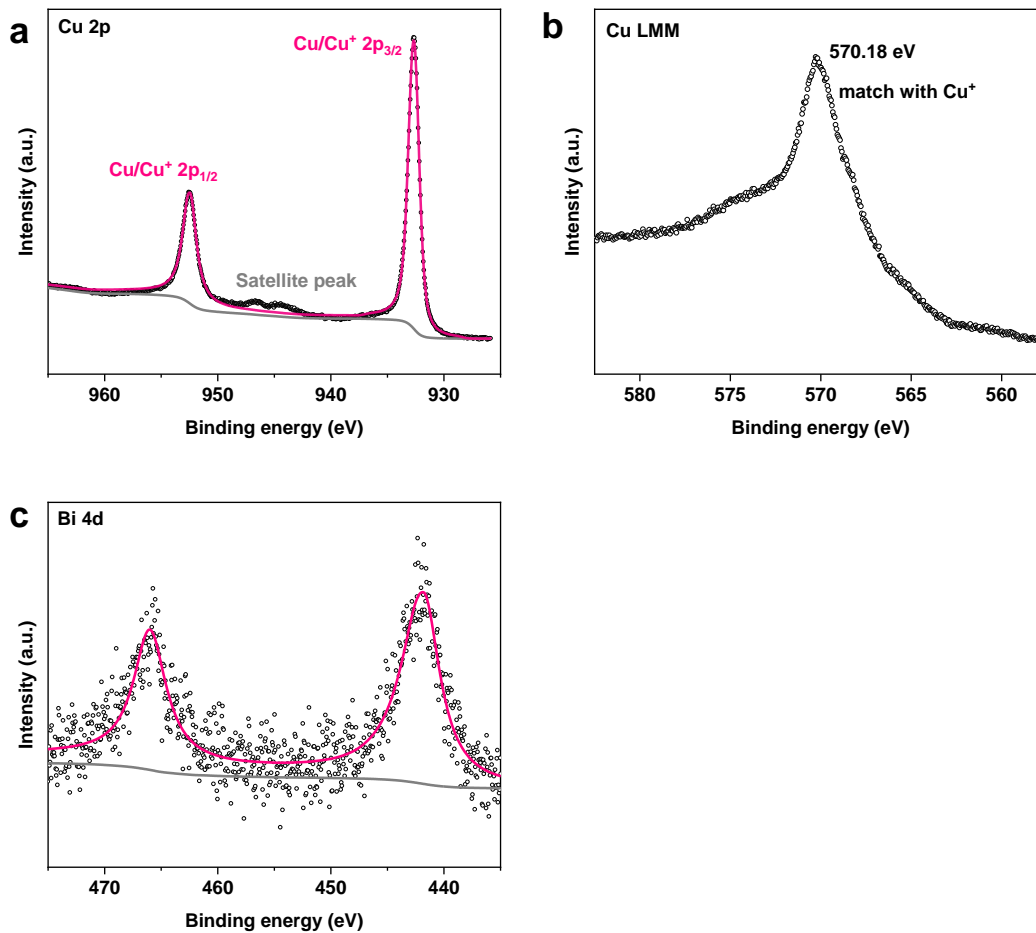

1

2 **Supplementary Fig. 9 | XPS spectra of the BiCu-SAA catalyst:** (a) Cu 2p spectrum,  
 3 (b) Cu LMM spectrum, (c) Bi 4d spectrum.

4 Note: Based on the Cu LMM spectrum, the Cu<sup>+</sup> valence state can be detected and  
 5 confirmed, revealing the part oxidation of Cu nanoparticle during exposure to air.  
 6 Meanwhile, the presence of bismuth on the surface can be demonstrated by the Bi 4d  
 7 spectrum.

8

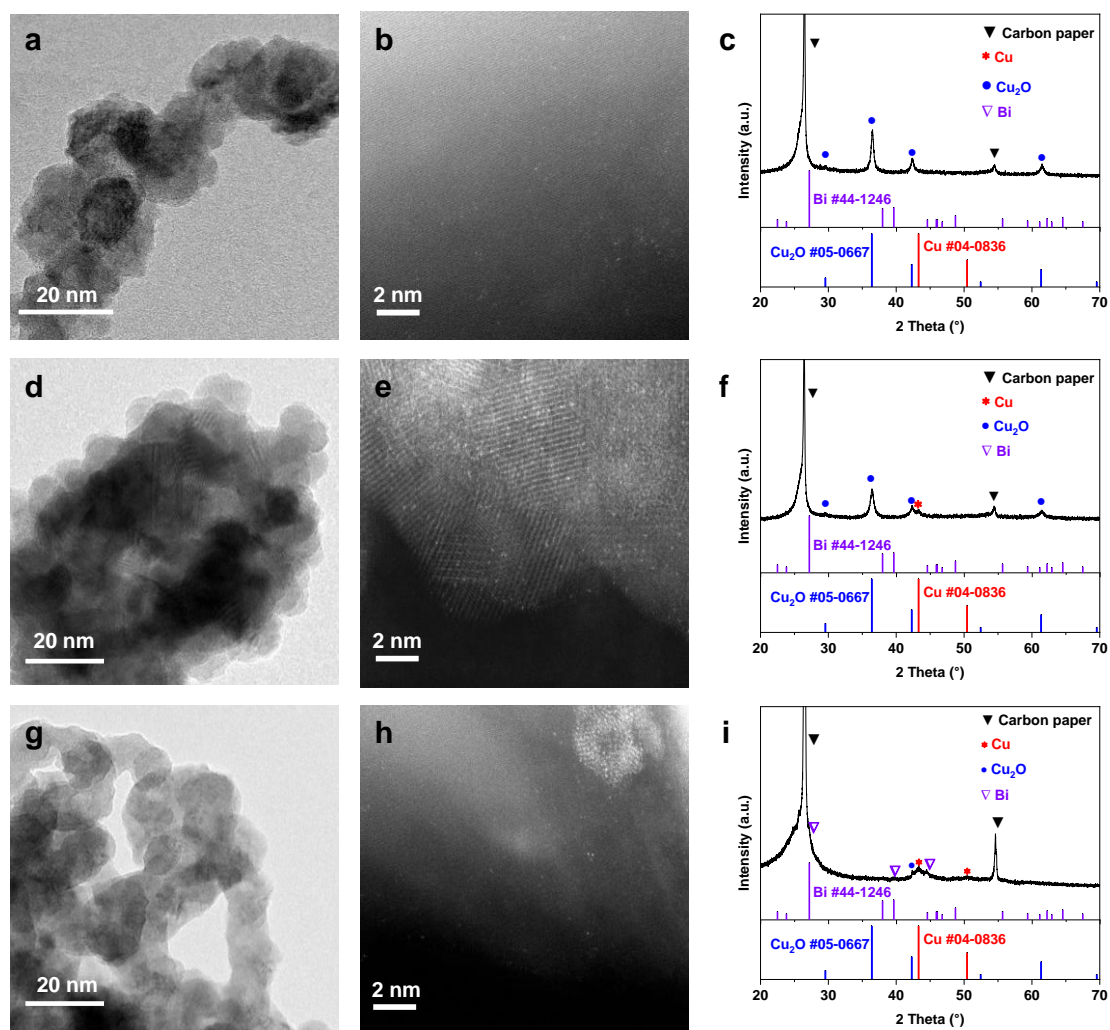

1

2 **Supplementary Fig. 10** | HR-TEM images (a, d, g), HADDF-STEM images (b, e, h)  
 3 and XRD patterns (c, f, i) of the BiCu-SAA catalysts with Bi content of 2.2 wt%, 6.5  
 4 wt% and 15.6 wt%, respectively.

5 Note: The above characterization results validate the formation of single atomic  
 6 dispersion of Bi on the Cu when Bi content is not higher than 6.5 wt%, and the  
 7 coexistence of Bi nanoparticles and single atoms is observed for the sample with Bi  
 8 content of 15.6 wt%.

9

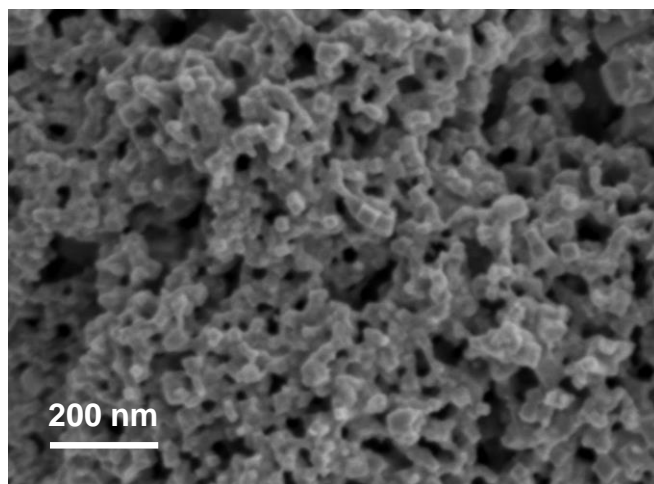

1

2 **Supplementary Fig. 11** | SEM image of the BiCu-SAA catalyst.

3

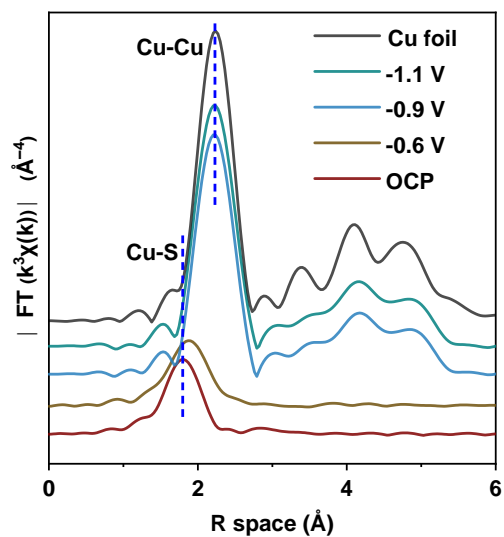

1  
2  
3  
4

**Supplementary Fig. 12** | Fourier transform curves of in-situ EXAFS data at Cu K-edge for the BiCu-SAA catalyst.

1

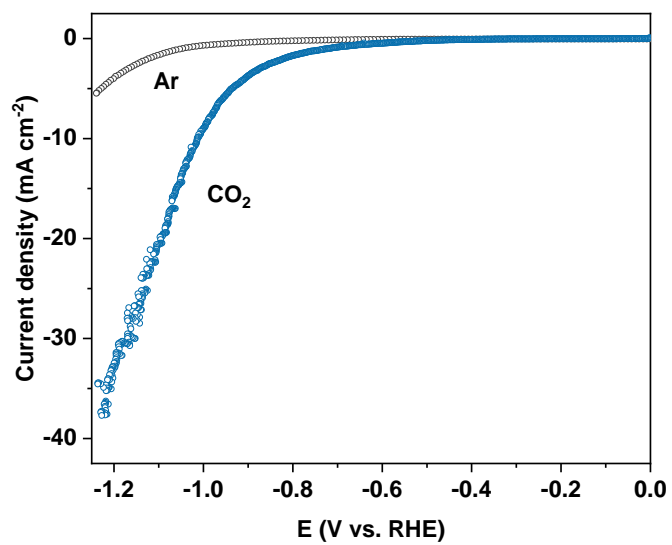

2

3 **Supplementary Fig. 13** | LSV curves of the BiCu-SAA catalyst obtained at the scan  
4 rate of 10 mV s<sup>-1</sup> in an H-type cell under CO<sub>2</sub> and Ar flow, respectively.

5

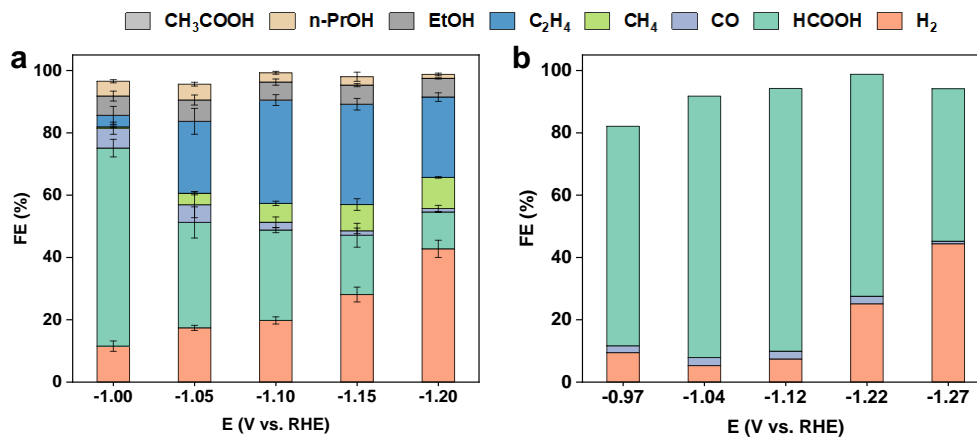

1

2 **Supplementary Fig. 14** | The FEs of CO<sub>2</sub>RR products on the control samples obtained

3 at different applied potentials: (a) Cu-Nano; (b) Bi-Nano.

4

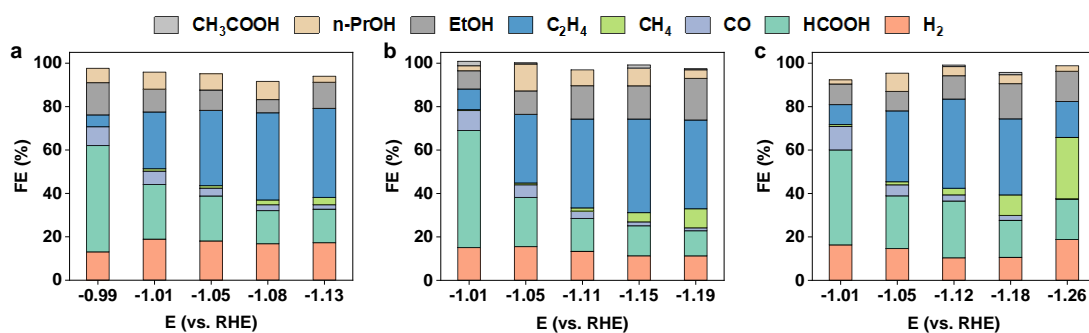

1

2 **Supplementary Fig. 15** | The FEs of  $\text{CO}_2\text{RR}$  products on the BiCu-SAA catalysts with

3 different Bi content obtained at different applied potentials: (a) 2.2 wt%, (b) 6.5 wt%,

4 (c) 15.6 wt%.

5

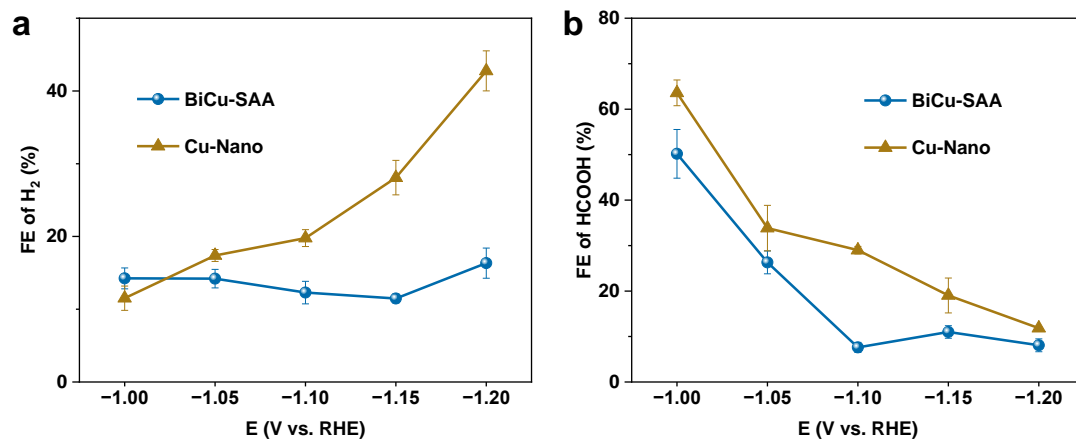

1

2 **Supplementary Fig. 16** | The FEs of H<sub>2</sub> (a) and HCOOH (b) on the BiCu-SAA and

3 Cu-Nano catalysts obtained at different applied potentials.

4

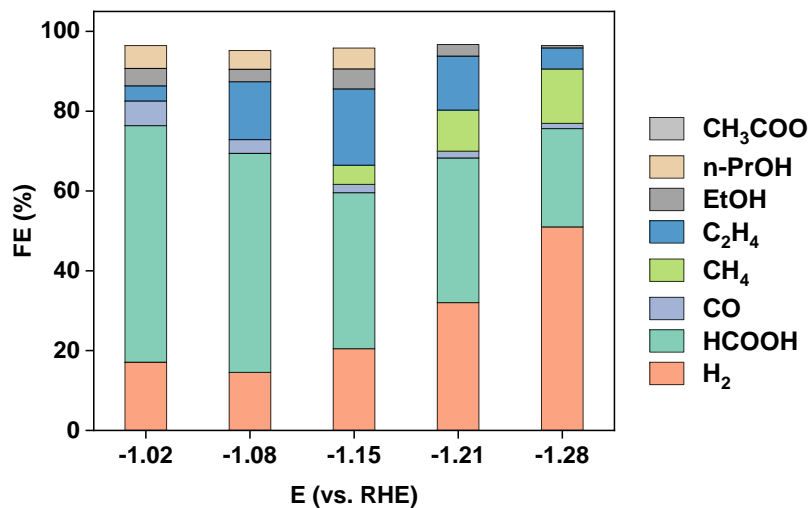

1

2 **Supplementary Fig. 17** | The FEs of CO<sub>2</sub>RR products on the BiCu-Nano catalyst  
 3 obtained at different applied potentials.

4 Note: It exhibits even more inferior FEs for the C<sub>2</sub>+ products with respect to the Cu-  
 5 Nano catalyst, as should result from partial coverage of loaded Bi on the Cu active sites.

6

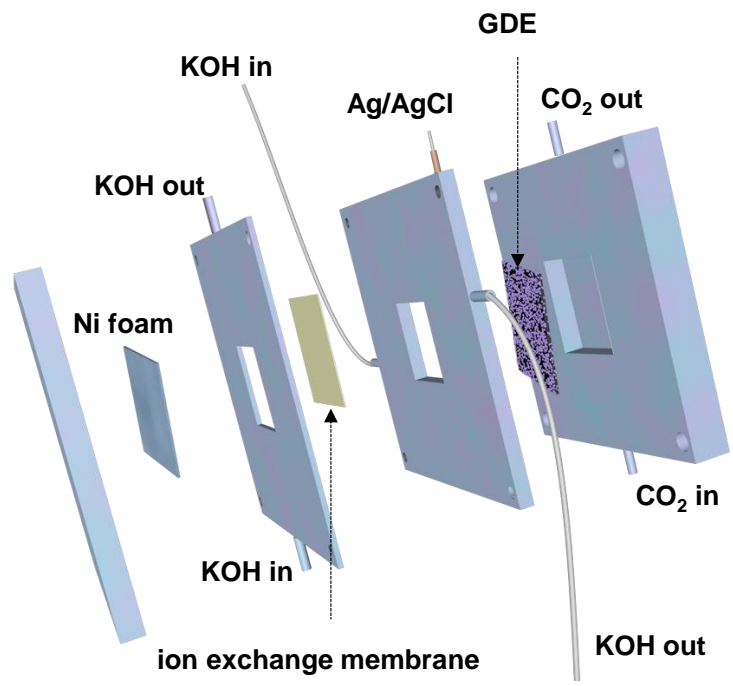

1  
2  
3

**Supplementary Fig. 18** | Schematic diagram of the flow-cell for CO<sub>2</sub>RR.

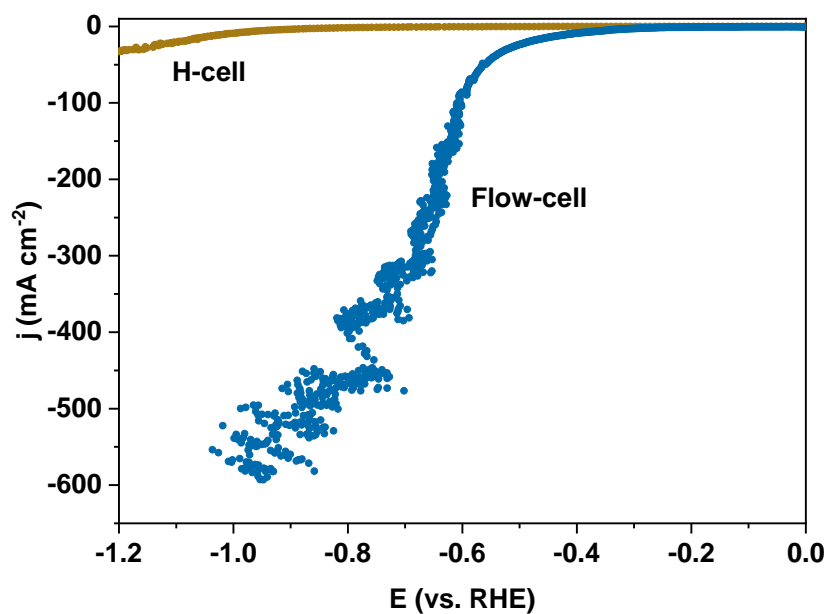

1

2 **Supplementary Fig. 19** | LSV curves of CO<sub>2</sub>RR in the H-type cell and the flow-cell.

3 Note: The scan rate is 10 mV s<sup>-1</sup>. The polarization response curve in the flow cell shows

4 a significant improvement in current density with respect to the H-type cell, as can be

5 attributed to enhanced CO<sub>2</sub> mass transport at the three-phase interfaces and the catalytic

6 promotion effect of hydroxide ions.

7

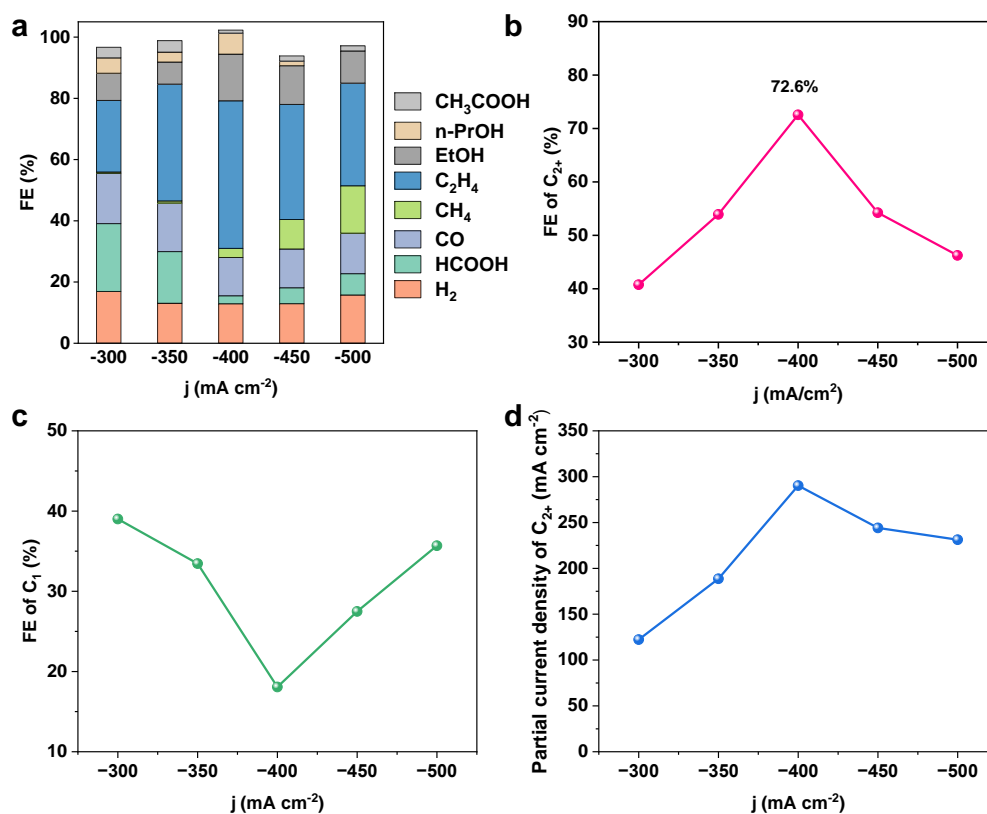

1

2 **Supplementary Fig. 20 | Performance of CO<sub>2</sub>RR on the BiCu-SAA in the flow-cell**  
 3 **as a function of current density. (a) FEs values of various products, (b) FEs of C<sub>2+</sub>**  
 4 **products, (c) FEs of C<sub>1</sub> products, (d) The partial current density of C<sub>2+</sub> products.**

5

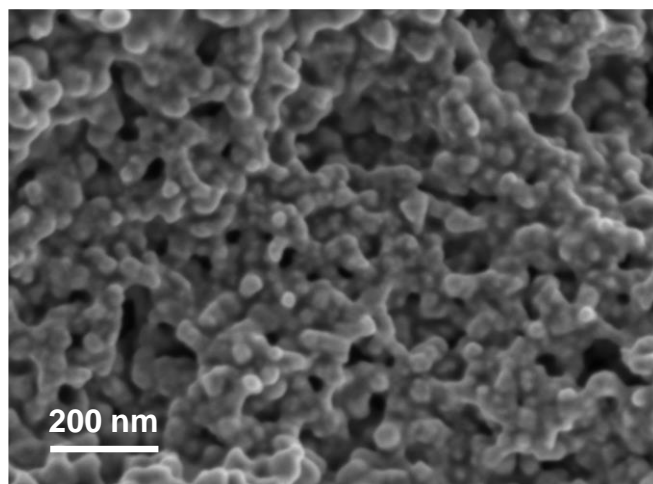

1

2 **Supplementary Fig. 21** | SEM image of the BiCu-SAA catalyst after stability test.

3

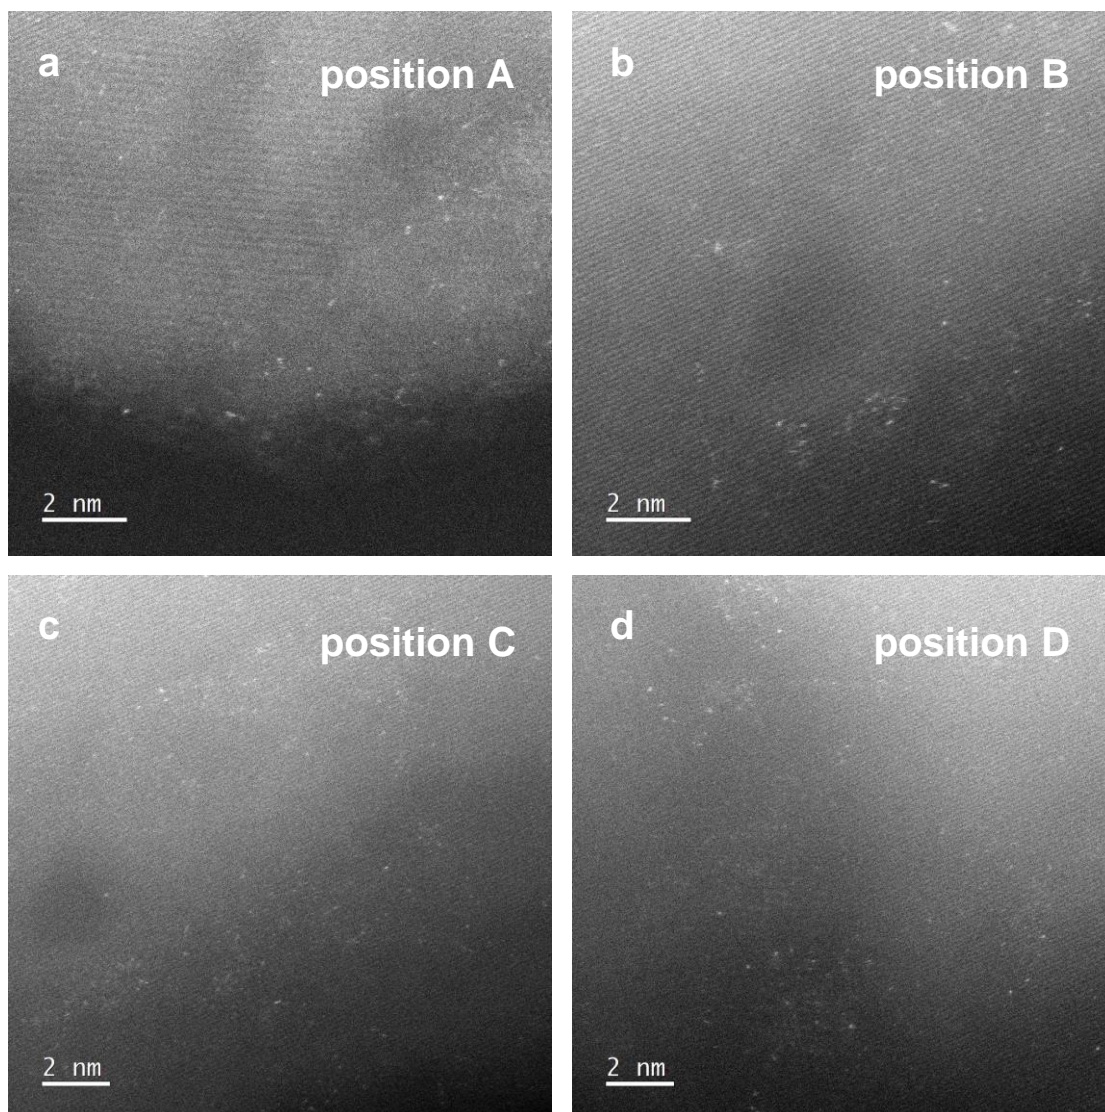

1  
2  
3  
4  
5

**Supplementary Fig. 22** | HADDF-STEM images obtained at different positions of the BiCu-SAA catalyst after stability test.

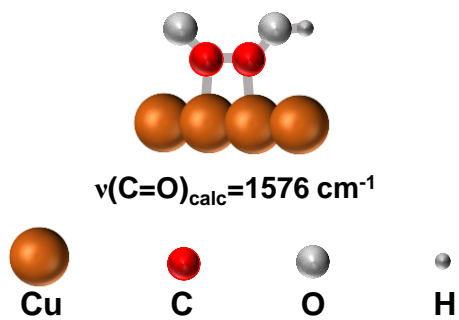

1

2 **Supplementary Fig. 23** | The calculated (calc) harmonic vibrational frequencies of the

3 C=O stretching vibration in the \*COCOH intermediates on the Cu adsorption sites.

4

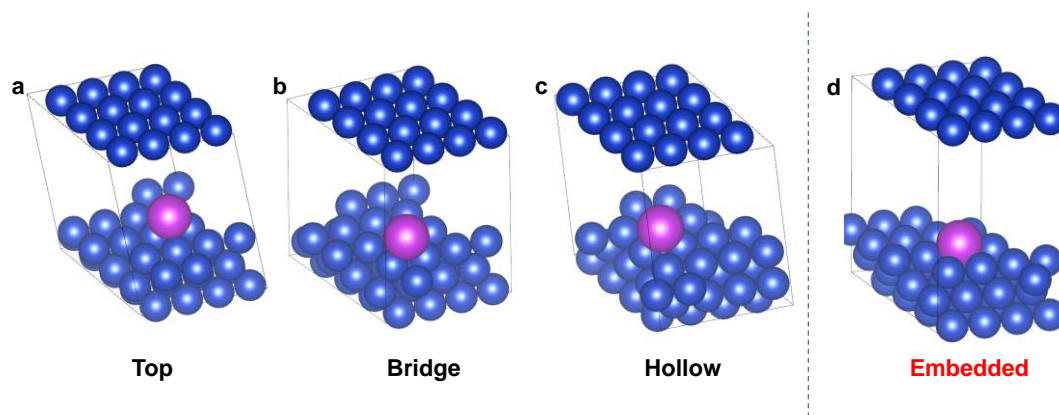

1

2 **Supplementary Fig. 24** | Different configuration of Bi atom on Cu(111) slab. **a, b, c,**

3 Bi supported on the Cu(111) surface. **d,** Bi embedded in the Cu(111) surface. (Cu, blue;

4 Bi, purple).

5 Note: By calculating the binding energy, the Bi atom was more inclined to be embedded

6 in the Cu(111)-Nano rather than supported on the Cu(111)-Nano surface, which is

7 consistent with the HAADF-STEM result. Thus, the configuration of Bi embedded in

8 Cu(111)-Nano slab was used for DFT calculations.

9

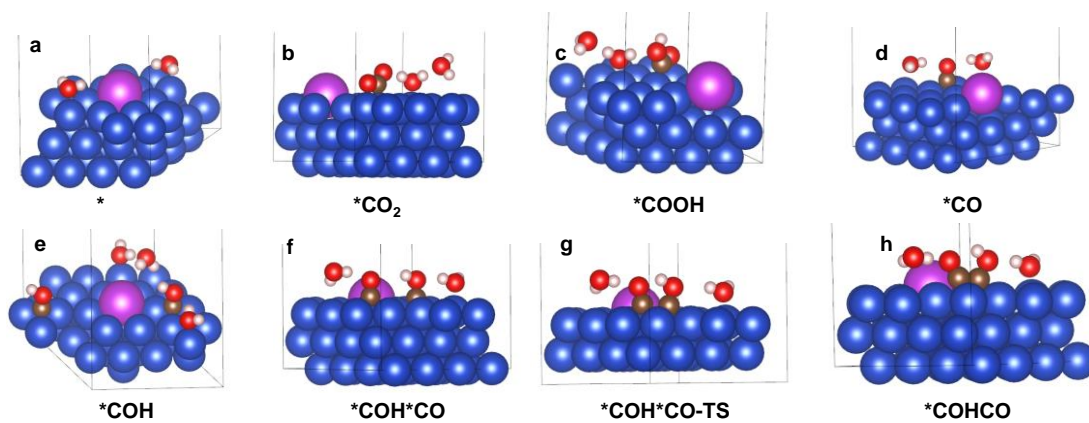

1

2 **Supplementary Fig. 25** | The optimized structures of the key intermediates on the

3 BiCu(111)-SAA slab. Cu, blue; Bi, purple; C, golden; O, red; H, white.

4

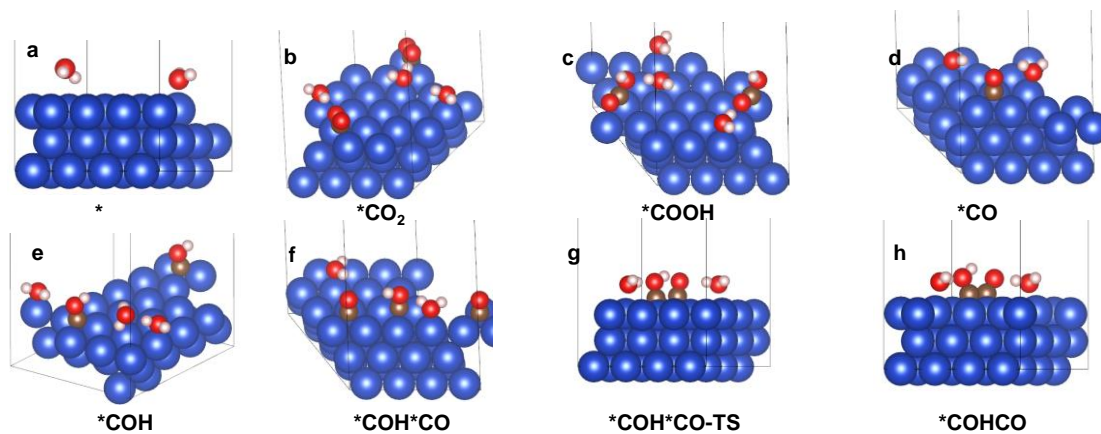

1

2 **Supplementary Fig. 26** | The optimized structures of the key intermediates on the

3 Cu(111)-Nano slab. Cu, blue; C, golden; O, red; H, white.

4

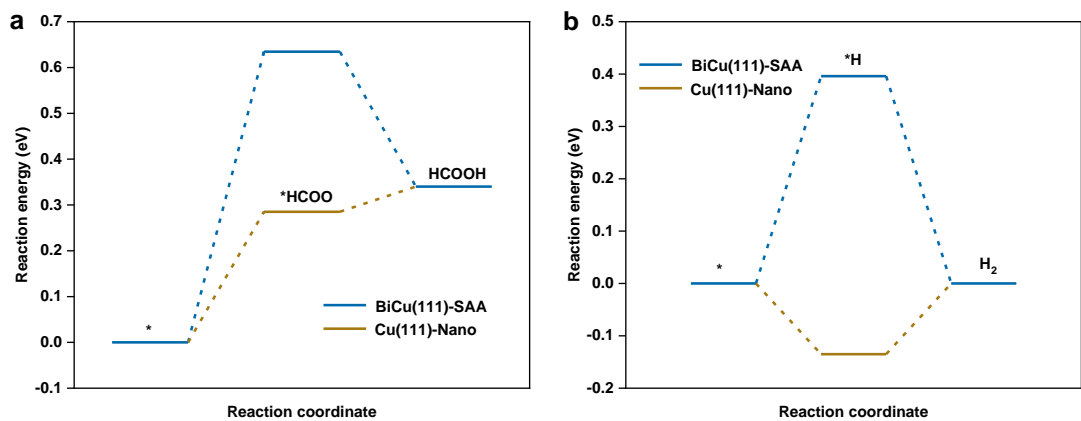

1

2 **Supplementary Fig. 27** | The reaction energy diagram for the CO<sub>2</sub>RR to formate **(a)**

3 and HER **(b)** on the BiCu(111)-SAA and Cu(111)-Nano.

4

1 **Supplementary Table 1** | Electrocatalytic performances for CO<sub>2</sub>RR over Cu-based  
 2 single atom catalysts reported recently

| Catalyst                         | Electrocatalytic Cell | Electrolyte             | Main product                  | FE                          | Ref.             |
|----------------------------------|-----------------------|-------------------------|-------------------------------|-----------------------------|------------------|
| BiCu-SAA                         | H-cell                | 0.1 M KHCO <sub>3</sub> | C <sub>2</sub> H <sub>4</sub> | 73.4%<br>(C <sub>2+</sub> ) | This work        |
|                                  | Flow-cell             | 1.0 M KOH               | C <sub>2</sub> H <sub>4</sub> | 72.6%<br>(C <sub>2+</sub> ) |                  |
| Cu <sub>97</sub> Sn <sub>3</sub> | H-cell                | 0.5 M KHCO <sub>3</sub> | CO                            | CO<br>(98%)                 | Ref <sup>3</sup> |
| Pb <sub>1</sub> Cu               | Flow-cell             | 0.5 M KHCO <sub>3</sub> | HCOOH                         | HCOOH<br>(96%)              | Ref <sup>4</sup> |
| Sn-CuO                           | H-cell                | Ionic liquid            | MeOH                          | MeOH<br>(88.6%)             | Ref <sup>5</sup> |
| Bi-Pd SAA                        | H-cell                | 0.5 M KHCO <sub>3</sub> | CO                            | CO<br>(90.5%)               | Ref <sup>6</sup> |
| Cu <sub>1</sub> Au               | H-cell                | 0.1 M KHCO <sub>3</sub> | CO                            | CO<br>(95%)                 | Ref <sup>7</sup> |
| AgCu SAA                         | H-cell                | 0.1 M KHCO <sub>3</sub> | CO                            | CO<br>(97.5%)               | Ref <sup>8</sup> |

3

1 **Supplementary Table 2** | The exact reaction conditions for different catalysts

| Bi content<br>(wt%) | CuTuCl·0.5H <sub>2</sub> O<br>(mg) | Bi(DDTC) <sub>3</sub><br>(mg) | EG (mL) | Temperature<br>(°C) | Time<br>(h) |
|---------------------|------------------------------------|-------------------------------|---------|---------------------|-------------|
| 0                   | 50                                 | 0                             | 40      | 120                 | 2           |
| 2.2                 | 50                                 | 30                            | 40      | 120                 | 1.5         |
| 3.7                 | 50                                 | 30                            | 40      | 120                 | 2           |
| 6.5                 | 50                                 | 50                            | 40      | 120                 | 2           |
| 15.6                | 50                                 | 30                            | 40      | 120                 | 4           |
| 100                 | 0                                  | 30                            | 40      | 120                 | 3           |

2

1 **Supplementary Table 3** | The exact reaction conditions for different catalysts

| <b>Configuration</b> | <b>Binding energy (eV)</b> |
|----------------------|----------------------------|
| top                  | -4.418                     |
| bridge               | 4.417                      |
| hollow               | -4.445                     |
| <b>embedded</b>      | <b>-5.670</b>              |

2

## 1 **Supplementary References**

- 2 1. Nørskov, J. K. et al. Origin of the overpotential for oxygen reduction at a fuel-cell  
3 cathode. *J. Phys. Chem. B* **108**, 17886-17892 (2004).
- 4 2. Wang, V. et al. Vaspkit:A user-friendly interface facilitating high-throughput  
5 computing and analysis using vasp code. *Comput. Phys. Commun.* **267**, 108033  
6 (2021).
- 7 3. Ren, W. et al. Isolated copper-tin atomic interfaces tuning electrocatalytic CO<sub>2</sub>  
8 conversion. *Nat. Commun.* **12**, 1449 (2021).
- 9 4. Zheng, T. et al. Copper-catalysed exclusive CO<sub>2</sub> to pure formic acid conversion via  
10 single-atom alloying. *Nat. Nanotechnol.* **16**, 1386-1393 (2021).
- 11 5. Guo, W. et al. Highly efficient CO<sub>2</sub> electroreduction to methanol through atomically  
12 dispersed Sn coupled with defective CuO catalysts. *Angew. Chem. Int. Ed.* **60**,  
13 21979-21987 (2021).
- 14 6. Xie, H. et al. Boosting Pd-catalysis for electrochemical CO<sub>2</sub> reduction to CO on Bi-  
15 Pd single atom alloy nanodendrites. *Appl. Catal. B Environ.* **289**, 119783 (2021).
- 16 7. Zhao, Y. et al. Atomic-level-designed copper atoms on hierarchically porous gold  
17 architectures for high-efficiency electrochemical CO<sub>2</sub> reduction. *Sci. China Mater.*  
18 **64**, 1900-1909 (2021).
- 19 8. Wang, H. et al. Surface restructuring in AgCu single-atom alloy catalyst and self-  
20 enhanced selectivity toward CO<sub>2</sub> reduction. *Electrochim. Acta* **426**, 140774 (2022).
